# Supplementary material for: ALMA detection and astrobiological potential of vinyl cyanide on Titan
Source: PubMed Central journal article supplement — Sci Adv. 2017 Jul 28;3(7):e1700022. doi: 10.1126/sciadv.1700022 (PMC5533535; doi:10.1126/sciadv.1700022), 2017-07-28
Supplement: 1700022_SM.pdf [file 1700022_SM.pdf]

## Supplementary Materials for

### **ALMA detection and astrobiological potential of vinyl cyanide on Titan**

Maureen Y. Palmer, Martin A. Cordiner, Conor A. Nixon, Steven B. Charnley, Nicholas A. Teanby,  
Zbigniew Kisiel, Patrick G. J. Irwin, Michael J. Mumma

Published 28 July 2017, *Sci. Adv.* **3**, e1700022 (2017)  
DOI: 10.1126/sciadv.1700022

#### **This PDF file includes:**

- fig. S1. Integrated flux contour map for C<sub>2</sub>H<sub>3</sub>CN, summed over the three detected transitions.
- table S1. Observational parameters.

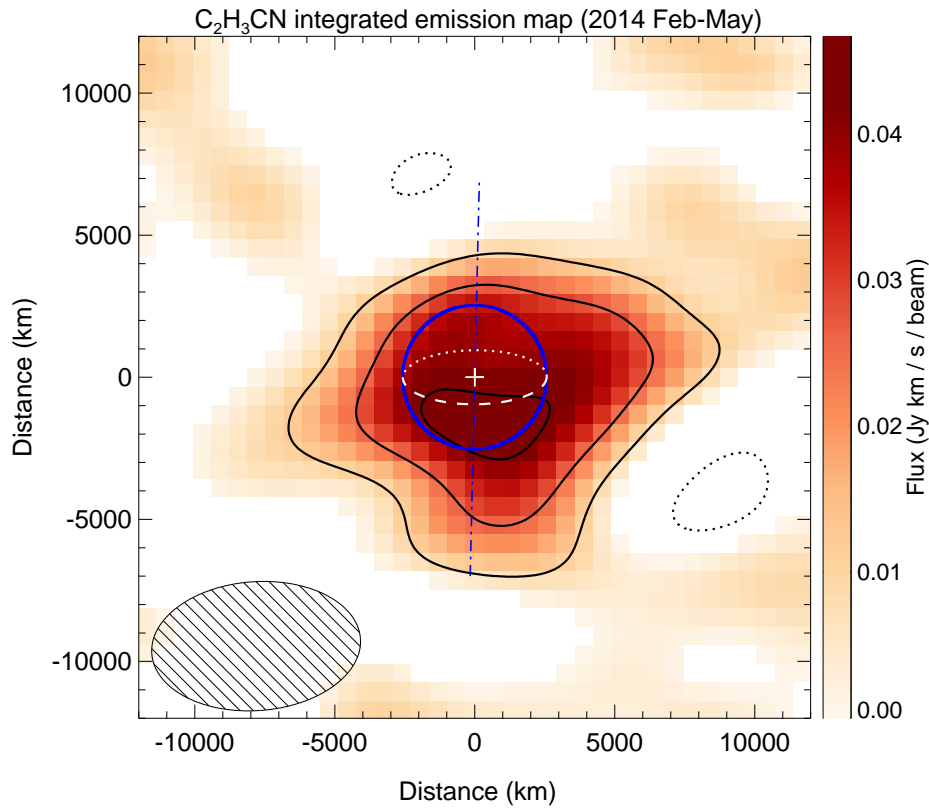

**fig. S1. Integrated flux contour map for C<sub>2</sub>H<sub>3</sub>CN, summed over the three detected transitions.** Contours are spaced at intervals of  $2\sigma$ , where  $\sigma$  is the RMS noise level ( $7.2 \text{ mJy km s}^{-1} \text{ beam}^{-1}$ ). Negative contours are dashed. The coordinate scale is in Titan-projected distances (white cross denotes the position of the phase center). Axes are aligned in the equatorial coordinate system. The blue circle represents Titan's  $0.77''$ -diameter disk (dashed white curve is the equator), and the dot-dashed blue line is the polar axis, oriented  $1.3^\circ$  clockwise from vertical, with the north pole tilted toward the observer by  $22^\circ$ . The FWHM of the Gaussian restoring beam ( $1.1'' \times 0.7''$ ) and its orientation are shown as a hatched ellipse.

**table S1. Observational parameters.**

| ID                | Date       | Frequency<br>(GHz) | Obs. time<br>(s) | Distance<br>(AU) | # Antennas | Baselines<br>(m) | Spect. Res.<br>(kHz) | $\theta_{min}$<br>(") | PWV<br>(mm) | RMS<br>(mJy/bm) |
|-------------------|------------|--------------------|------------------|------------------|------------|------------------|----------------------|-----------------------|-------------|-----------------|
| Spectral Region 1 |            |                    |                  |                  |            |                  |                      |                       |             |                 |
| 2012.1.00437.S    | 2014-03-10 | 230-231            | 151              | 9.4              | 26         | 15.2-422         | 488                  | $0.99 \times 0.65$    | 1.53        | 7.1             |
| 2012.1.00437.S    | 2014-03-10 | 230-231            | 151              | 9.4              | 28         | 15.2-423         | 488                  | $1.11 \times 0.62$    | 1.40        | 6.7             |
| 2012.1.00336.S    | 2014-03-24 | 230-231            | 151              | 9.2              | 33         | 15.1-438         | 488                  | $1.09 \times 0.69$    | 1.42        | 7.8             |
| 2012.1.00336.S    | 2014-03-24 | 230-231            | 151              | 9.2              | 33         | 15.1-438         | 488                  | $1.38 \times 0.69$    | 1.37        | 7.9             |
| 2012.1.00336.S    | 2014-03-25 | 230-231            | 151              | 9.2              | 32         | 15.1-438         | 488                  | $1.29 \times 0.69$    | 0.58        | 5.7             |
| 2012.1.00198.S    | 2014-03-26 | 230-232            | 151              | 9.2              | 32         | 15.2-438         | 976                  | $1.08 \times 0.68$    | 0.64        | 5.0             |
| 2012.1.00261.S    | 2014-04-04 | 229-231            | 152              | 9.1              | 34         | 15.1-443         | 976                  | $0.89 \times 0.70$    | 2.06        | 4.6             |
| Combined          |            |                    |                  |                  |            |                  |                      | $1.12 \times 0.68$    |             | 2.3             |
| Spectral Region 2 |            |                    |                  |                  |            |                  |                      |                       |             |                 |
| 2012.1.00635.S    | 2014-02-22 | 231-233            | 311              | 9.7              | 27         | 15.1-399         | 976                  | $1.67 \times 0.89$    | 0.69        | 5.8             |
| 2012.1.00635.S    | 2014-03-21 | 231-233            | 311              | 9.3              | 36         | 15.1-438         | 976                  | $1.02 \times 0.66$    | 0.64        | 4.1             |
| 2012.1.00635.S    | 2014-04-25 | 231-233            | 156              | 8.9              | 35         | 19.6-558         | 976                  | $0.73 \times 0.58$    | 1.22        | 4.7             |
| 2012.1.00635.S    | 2014-05-27 | 231-233            | 156              | 8.9              | 31         | 17.8-641         | 976                  | $0.73 \times 0.50$    | 0.68        | 5.2             |
| Combined          |            |                    |                  |                  |            |                  |                      | $0.92 \times 0.69$    |             | 2.4             |
